# Supplementary material for: Simple hydrothermal preparation of carbon nanodots and their application in colorimetric and fluorimetric detection of mercury ions
Source: Royal Society of Chemistry journal article supplement (doi:10.1039/c5ay01301a), 2015-01-01
Supplement: c5ay01301a1.pdf [file c5ay01301a1.pdf]

## Supporting Information for

### Simple hydrothermal preparation of carbon nanodots and its colorimetric and fluorescent detection of mercury ions

Yan Liang, Hui Zhang, Yan Zhang, Fang Chen\*

*Key Laboratory for Large-Format Battery Materials and System (Ministry of  
Education), School of Chemistry and Chemical Engineering, Huazhong University of  
Science and Technology, Wuhan 430074, P.R. China*

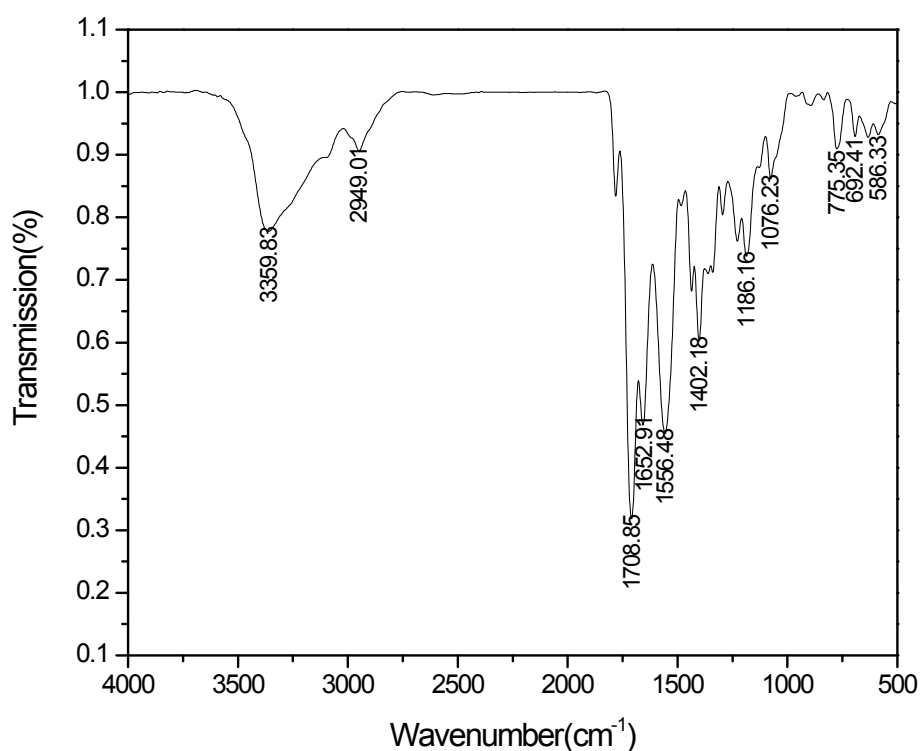

Figure S1 FTIR spectrum of CDs

\*Corresponding author: Tel.: +86-27-87543032, Fax: +86-27-87543632  
E-mail: fchen@mail.hust.edu.cn

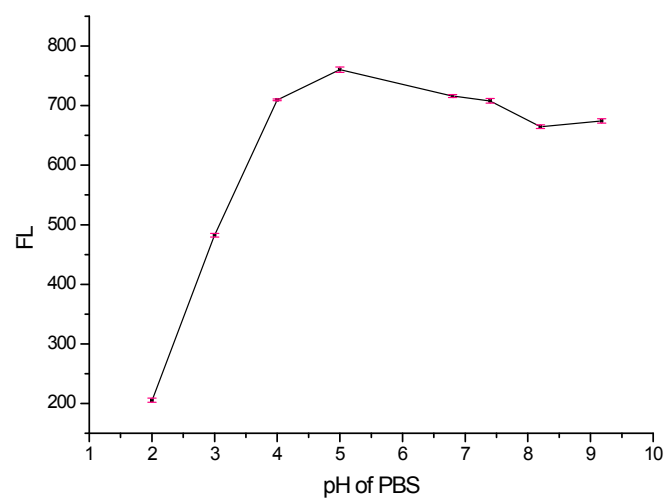

Figure S2 Fluorescence intensities of CDs solutions at different pH value (PBS).

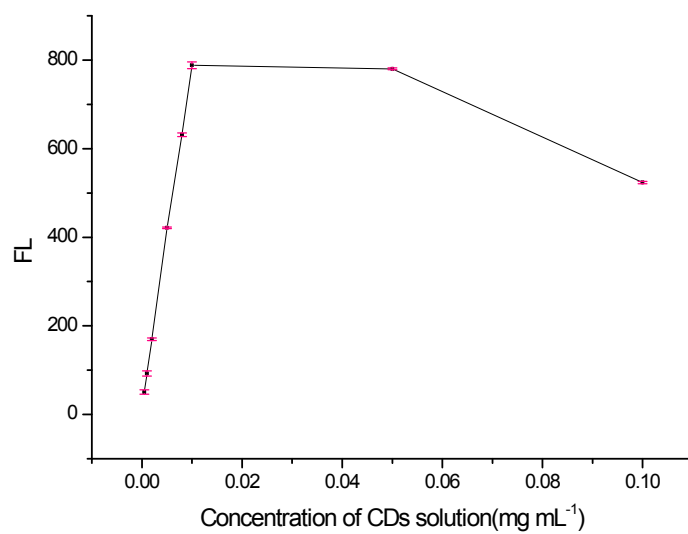

Figure S3 Concentration-dependent behavior of CDs in aqueous solution

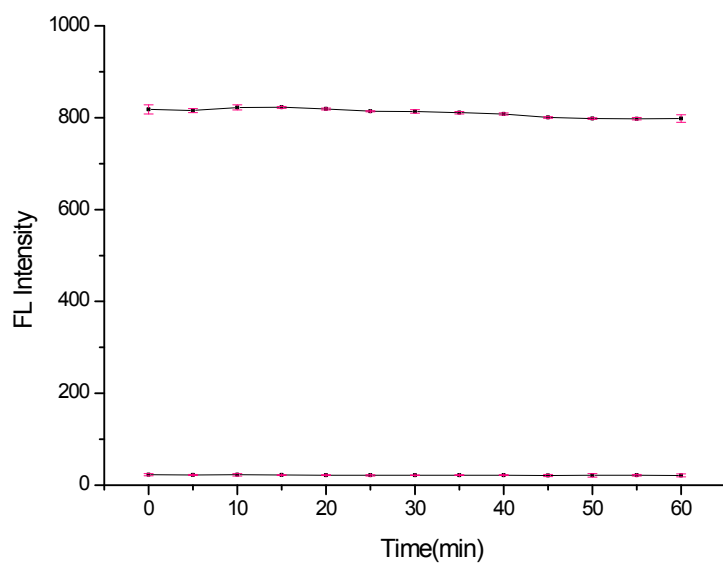

Figure S4 Stability of the system in (b) and out (a) of presence of  $\text{Hg}^{2+}$ . Concentration of  $\text{Hg}^{2+}$  is  $7.0 \times 10^{-7} \text{ mol L}^{-1}$ .
